# Supplementary material for: Male-specific coliphages for source tracking fecal contamination in surface waters and prevalence of Shiga-toxigenic Escherichia coli in a major produce production region of the Central Coast of California
Source: Royal Society of Chemistry journal article supplement (doi:10.1039/c4em00537f), 2015-01-01
Supplement: c4em00537f1.pdf [file c4em00537f1.pdf]

Table S1. Characterization of *E. coli* O157:H7 and Shiga-toxigenic *E. coli* isolated from swab samples collected from various locations.

| Location | Date of collection <sup>a</sup> | Pathogen type <sup>b</sup> | Strain      | MLVA | <i>rfbE</i>     | <i>stx1</i> | <i>stx2</i> | <i>eaeA</i> | subtilase | <i>ehxA</i> | <i>hlyA</i> | <i>fliC</i>     |
|----------|---------------------------------|----------------------------|-------------|------|-----------------|-------------|-------------|-------------|-----------|-------------|-------------|-----------------|
| SABSAL   | 1/15/13                         | STEC                       | FN875-A1R   | 1104 | NT <sup>c</sup> | +           | -           | +           | -         | +           | NT          | NA <sup>d</sup> |
| SABSAL   | 2/20/13                         | STEC                       | FN955-H3NB  | 401  | NT              | +           | +           | -           | +         | +           | NT          | NA              |
| SABSAL   | 2/20/13                         | STEC                       | FN955-A4NB  | 401  | NT              | +           | +           | -           | +         | +           | NT          | NA              |
| SABSAL   | 2/20/13                         | STEC                       | FN955-H9NB  | 401  | NT              | +           | +           | -           | +         | +           | NT          | NA              |
| SABSAL   | 2/20/13                         | STEC                       | FN955-B10B  | 401  | NT              | +           | +           | -           | +         | +           | NT          | NA              |
| SABSAL   | 3/6/13                          | STEC                       | FN983-C3B   | 357  | NT              | +           | -           | -           | +         | +           | NT          | NA              |
| SABSAL   | 5/29/13                         | O157:H7                    | FN1143-1    | 1150 | +               | -           | +           | +           | NT        | NT          | +           | +               |
| SABSAL   | 6/26/13                         | STEC                       | FN1193-F3B  | 302  | NT              | +           | +           | -           | +         | +           | NT          | NA              |
| SABSAL   | 6/26/13                         | STEC                       | FN1193-B4B  | 302  | NT              | +           | +           | -           | +         | +           | NT          | NA              |
| SABSAL   | 6/26/13                         | STEC                       | FN1193-C4NB | 302  | NT              | +           | +           | -           | +         | +           | NT          | NA              |
| SABSAL   | 8/7/13                          | STEC                       | FN1270-F12B | 1115 | NT              | +           | -           | -           | -         | -           | NT          | NA              |
| ALICAR   | 4/3/13                          | O157:H7                    | FN1052-1    | 1146 | +               | +           | +           | +           | NT        | NT          | +           | +               |
| ALICAR   | 4/3/13                          | O157:H7                    | FN1052-5    | 1105 | +               | +           | +           | +           | NT        | NT          | +           | +               |
| ALICAR   | 4/3/13                          | STEC                       | FN1052-E10B | 95   | NT              | -           | +           | -           | -         | +           | NT          | NA              |
| GABVET   | 3/6/13                          | STEC                       | FN997-A3NB  | 1014 | NT              | +           | -           | +           | -         | +           | NT          | NA              |
| GABVET   | 3/6/13                          | STEC                       | FN997-B3NB  | 1014 | NT              | +           | -           | +           | -         | +           | NT          | NA              |
| GABVET   | 3/6/13                          | STEC                       | FN997-G3NB  | 1014 | NT              | +           | -           | +           | -         | +           | NT          | NA              |
| GABVET   | 3/6/13                          | STEC                       | FN997-B5NB  | 1014 | NT              | +           | -           | +           | -         | +           | NT          | NA              |
| GABVET   | 3/6/13                          | STEC                       | FN997-D5NB  | 1014 | NT              | +           | -           | +           | -         | +           | NT          | NA              |
| GABVET   | 3/6/13                          | STEC                       | FN997-H5B   | 1014 | NT              | +           | -           | +           | -         | +           | NT          | NA              |
| GABVET   | 6/26/13                         | O157:H7                    | FN1207-1    | 1075 | +               | +           | +           | +           | NT        | NT          | +           | +               |
| GFBELM   | 1/2/13                          | O157:H7                    | FN849-2     | 1135 | +               | +           | +           | +           | NT        | NT          | +           | +               |
| GFBELM   | 2/13/13                         | O157:H7                    | FN931-1     | 1144 | +               | -           | +           | +           | NT        | NT          | +           | +               |
| GFBELM   | 2/13/13                         | O157:H7                    | FN931-4     | 1106 | +               | -           | +           | +           | NT        | NT          | +           | +               |
| GFBELM   | 2/20/13                         | O157:H7                    | FN958-1     | 1106 | +               | -           | +           | +           | NT        | NT          | +           | +               |
| GFBELM   | 2/20/13                         | STEC                       | FN958-G2R   | 1095 | NT              | +           | -           | -           | -         | -           | NT          | NA              |
| GFBELM   | 3/6/13                          | STEC                       | FN986-C4NB  | 1098 | NT              | -           | +           | -           | -         | -           | NT          | NA              |
| GFBELM   | 3/6/13                          | STEC                       | FN986-D8NB  | 1088 | NT              | +           | -           | -           | -         | -           | NT          | NA              |
| GFBELM   | 5/1/13                          | STEC                       | FN1093-F2R  | 1120 | NT              | +           | -           | +           | -         | +           | NT          | NA              |
| GFBELM   | 5/1/13                          | STEC                       | FN1093-H2R  | 1119 | NT              | +           | -           | +           | -         | +           | NT          | NA              |
| GFBELM   | 5/29/13                         | STEC                       | FN1146-G2R  | 1111 | NT              | -           | +           | +           | -         | +           | NT          | NA              |

<sup>a</sup> More than one date of sampling indicate more than one strain isolated from the same sample.

<sup>b</sup> Characterizations based on growth on NT-Rainbow agar O157, CHROMagar O157, Sheep's blood agar with and without novobiocin. Results confirmed by real-time PCR for virulence genes (*stx1*, *stx2*, *eaeA*, subtilase, *hlyA*) and serotype specific genes (*rfbE* and *fliC*) <sup>1</sup>.

<sup>c</sup> not tested

<sup>d</sup>not applicable

1. M. B. Cooley, M. Jay-Russell, E. R. Atwill, D. Carychao, K. Nguyen, B. Quinones, R. Patel, S. Walker, M. Swimley, E. Pierre-Jerome, A. G. Gordus and R. E. Mandrell, *PLoS One*, 2013, **8**, e65716.
